# Supplementary material for: 3D printed microfluidic device for online detection of neurochemical changes with high temporal resolution in human brain microdialysate
Source: Royal Society of Chemistry journal article supplement (doi:10.1039/c9lc00044e), 2019-01-01
Supplement: c9lc00044e1.pdf [file c9lc00044e1.pdf]

## Supplementary information

### Biosensor fabrication

The following enzyme solutions were used to make biosensors: for glucose biosensors 60 mg/ml glucose oxidase, 30 mg/ml bovine serum albumin (BSA), 20 mg/ml poly(ethylene glycol) diglycidyl ether (PEGDE), 1% glycerol; for lactate biosensors 60 mg/ml lactate oxidase, 30 mg/ml BSA, 20 mg/ml PEDGE, 2% glycerol and for glutamate biosensors 50 mg/ml glutamate oxidase, 81 mg/ml BSA, 78 mg/ml PEDGE, 1% glycerol. All three solutions were made in 10 mM PBS. The electrodes were dipped into the enzyme solutions before being placed in the oven for 2 h at 55°C for glucose and lactate biosensors and for 1.5 h at 45°C for glutamate biosensors.

### Microdialysis probe fabrication

In-house concentric microdialysis probes were constructed using Spectra/Por microdialysis hollow fibers (200  $\mu\text{m}$  i.d., 280  $\mu\text{m}$  o.d., 13 kDa MWCO, regenerated cellulose, Spectrum Laboratories, Inc), Smiths Medical Portex inlet tubing (0.38 mm i.d., 1.09 mm o.d) and fused silica outlet tubing (75  $\mu\text{m}$  i.d., 150  $\mu\text{m}$  o.d.) were sealed onto a fused silica shaft (250  $\mu\text{m}$  i.d., 350  $\mu\text{m}$  o.d., Polymicro Technologies, CM scientific) using 2-Ton epoxy (ITW Devcon).

### PDMS chip used in current clinical monitoring setup

Figure S1 shows a picture of the microfluidic biosensor setup currently used for clinical monitoring. Unlike the 3D printed chip, the biosensor is inserted directly in the microfluidic channel without the use of a holder. Although a low internal dead volume, the biosensor / PDMS microfluidic chip combination is much less stable than with the 3D printed device. This setup is further described in: M. L. Rogers, C. L. Leong, S. A. Gowers, I. C. Samper, S. L. Jewell, A. Khan, L. McCarthy, C. Pahl, C. M. Talias, D. C. Walsh, A. J. Strong and M. G. Boutelle, *J. Cereb. Blood Flow Metab.*, 2017, **37**, 1883–1895.

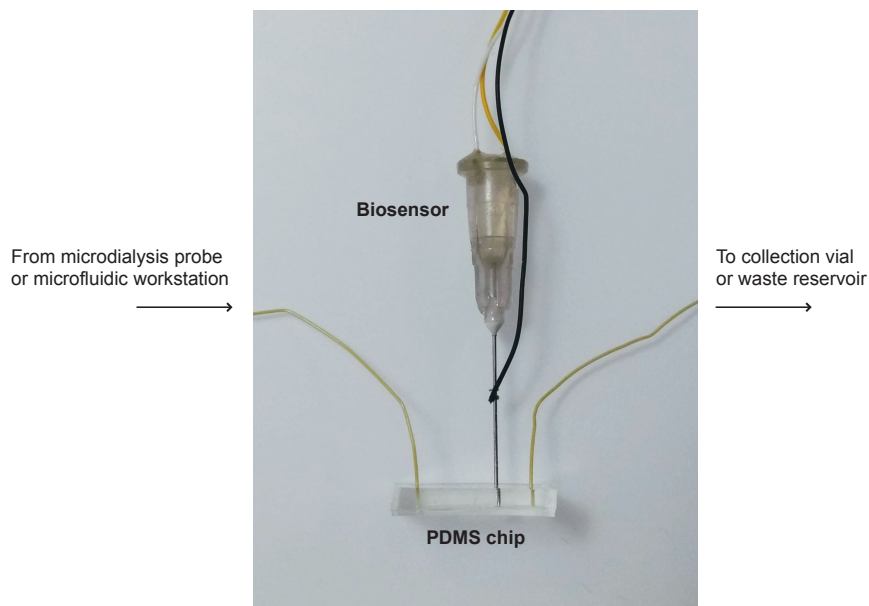

**Figure S1.** Picture of the PDMS microfluidic chip holding a biosensor, reproducing the measurement setup currently used for clinical monitoring of brain injured patients at King's College Hospital, London.

### CT scan images of microfluidic channel

Figure S2a and b shows CT scan images of the microfluidic channels of chip 2 and 3, printed with the Ultra 3SP and with the Objet 30 printers, respectively. The comparison between the two images shows that the channel definition of chip 2 was finer than that of chip 3.

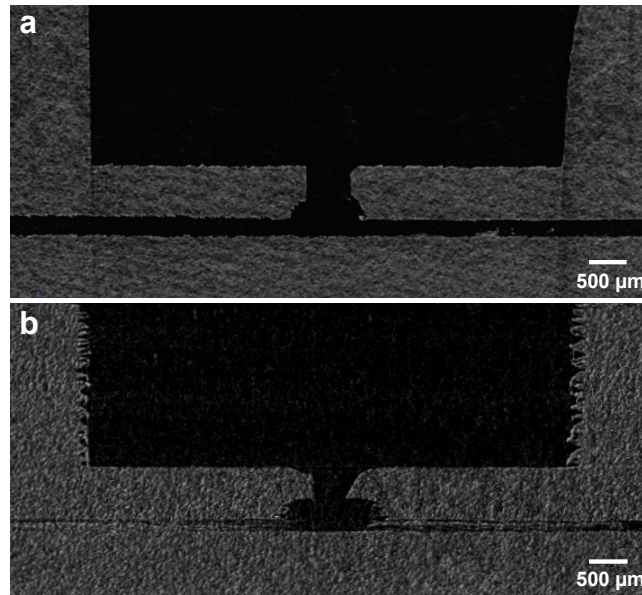

**Figure S2.** CT scan images of cross sections of channel 2 printed with the Ultra 3SP (a) and channel 3 printed with the Objet30 (b). a shows a very neat straight channel while b shows a distorted channel due to supporting material not cleared evenly (even though this chip was functional).

Figure S3 shows a cross section of chip 2, printed with the Ultra 3SP. The image shows that the microfluidic channel has rounded corners.

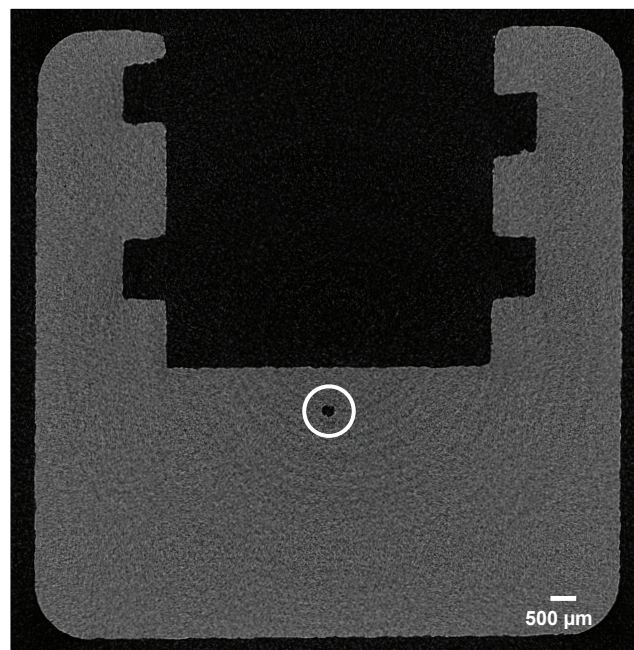

**Figure S3.** CT scan image of a cross section of chip 2. The white circle shows the quasi-circular microfluidic channel.
